# Supplementary material for: Phosphorylation of Calcineurin at a Novel Serine-Proline Rich Region Orchestrates Hyphal Growth and Virulence in Aspergillus fumigatus
Source: PubMed Central journal article supplement (PMC3749960; doi:10.1371/journal.ppat.1003564), 2013-08-22
Supplement: ppat.1003564.s001.pdf [file ppat.1003564.s001.pdf]

## CnBBH

## Linker (includes the SPRR)

## CaMBD

| Majority | 10                                                                                  | 20 | 30 | 40 | 50 | 60 | 70 | 80 | Majority | 90                                          | 100                                                                        | 110 | 120 | 130 | 140 | 150 |  |  |     |
|----------|-------------------------------------------------------------------------------------|----|----|----|----|----|----|----|----------|---------------------------------------------|----------------------------------------------------------------------------|-----|-----|-----|-----|-----|--|--|-----|
|          | NNVMNIRQFNCTPHPYWLPNFMVDVFTWSLPFVGEKITDMLIAILNNTCSKEELE-E-----EDE-----SXSP----PXS   |    |    |    |    |    |    |    |          | P-----MDPESX-EFRRRAIKNKILAIGRMSRVFQVLRREESE |                                                                            |     |     |     |     |     |  |  |     |
| Af cnaA  | NNVMNIRQFNCTPHPYWLPNFMVDVFTWSLPFVGEKITDMLIAILNNTCSKEELE-D-----ETPT----SVSPS---APS   |    |    |    |    |    |    |    | 66       | Af cnaA                                     | P-----PLP-----MDVRESS-EFKRRAIKNKILAIGRLSRVFQVLRREESE                       |     |     |     |     |     |  |  | 105 |
| Am CnaA  | NNVMNIRQFNCTPHPYWLPNFMVDVFTWSLPFVGEKITDMLVAVLNVCSKEELD-E-----GRE-----               |    |    |    |    |    |    |    | 57       | Am CnaA                                     | -----HVLDD-----RRQVIKNIKILAVGRMSKMFNLLRQEA                                 |     |     |     |     |     |  |  | 90  |
| Bc CnaA  | NNVMNIRQFNCTPHPYWLPNFMVDVFTWSLPFVGEKITDMLLAILSTSSDELKDD-----QTPS----STSPG---PIS     |    |    |    |    |    |    |    | 67       | Bc CnaA                                     | P-----PIN-----SPMDPESI-EYKRAIKNKILAIGRLSRVFQVLRREESE                       |     |     |     |     |     |  |  | 108 |
| Bd CnaA  | NNVMNIRQFNCSPPHYWLPNFMVDVFTWSLPFVGEKITDMLLAILNICSKEELA-D-----EDEI----QHVEG-----     |    |    |    |    |    |    |    | 63       | Bd CnaA                                     | -----EELTEQ-EQRVVVIRNKIKAVGRMARVFATLREEKE                                  |     |     |     |     |     |  |  | 98  |
| Ca cnaA  | NNVMNIRQFNASPPHYWLPNFMVDVFTWSLPFVGEKVTDMLVSIILNVCTEEELDEDLP--FSEAEIGVPTTTTGTATPVS   |    |    |    |    |    |    |    | 78       | Ca cnaA                                     | PKAYPPSSRITSPHKSTKLVESRANEEKANDGDDSEMTLEEKQALRNKIIAIGKMSRMFQVLRREEQE       |     |     |     |     |     |  |  | 148 |
| Cc CnaA  | -NVMNIRQFNCTPHPYWLPNFMVDVFTWSLPFVGEKITDMLVAVLNTCTKEELE-E-----PDED----LALIS---PT-    |    |    |    |    |    |    |    | 64       | Cc CnaA                                     | -----AAAES-AERRKI IKNKIMAVGRMARVFALLREESE                                  |     |     |     |     |     |  |  | 99  |
| Ce CnaA  | NNVMNIRQFNCSPPHYWLPNFMVDVFTWSLPFVGEKVTEMLVHILNICSDELMAEC----DDT-----                |    |    |    |    |    |    |    | 59       | Ce CnaA                                     | -----FEGGVG-SARKEVIRHKIRAIGKMARAFSVLRHESE                                  |     |     |     |     |     |  |  | 94  |
| Ci cnaA  | NNVMNIRQFNCTPHPYWLPNFMVDVFTWSLPFVGEKITDMLIAILNNTCSKEELE-E-----EPS----AFSSA---PAS    |    |    |    |    |    |    |    | 65       | Ci cnaA                                     | P-----PLP-----MDTDSA-EFKRRAIKNKILAIGRLSRVFQVLRREESE                        |     |     |     |     |     |  |  | 104 |
| Cn CnaA  | -NVMNIRQFNCTPHPYWLPNFMVDVFTWSLPFVGEKITDMLIAILNCCCTKEELE-E-----EDEE----FPLNA---PEP   |    |    |    |    |    |    |    | 65       | Cn CnaA                                     | -----TDAESA-AERRQI IKNKILAVGRMSRVFSLLREESE                                 |     |     |     |     |     |  |  | 100 |
| Dd CnaA  | NNVMNIRQFTCSPPHYWLPNFMVDVFTWSMPFVSEKVAEMLLVLLNLCNDEEAE-----KNEN----AQTVK-----       |    |    |    |    |    |    |    | 62       | Dd CnaA                                     | -----DTSEE--EKRRQMLRAKVKSVSKMMRMFSLLRQERE                                  |     |     |     |     |     |  |  | 96  |
| Fv CnaA  | NNVMNIRQFNCTPHPYWLPNFMVDVFTWSLPFVGEKITDMLIAILSTCSEELK-E-----ETPS----STSPG---PAS     |    |    |    |    |    |    |    | 66       | Fv CnaA                                     | P-----ALS-----N--DPESI-EVRRRAIKNKILAIGRLSRVFQVLRREESE                      |     |     |     |     |     |  |  | 105 |
| Hc CnaA  | NNVMNIRQFNCTPHPYWLPNFMVDVFTWSLPFVGEKITDMLIAILNNTCSKEELE-E-----EPSS----SVSSD---RAS   |    |    |    |    |    |    |    | 66       | Hc CnaA                                     | P-----PLP-----MDPEST-EFKRRAIKNKILAIGRLSRVFQVLRREEAE                        |     |     |     |     |     |  |  | 105 |
| Hc naA   | NNVMNIRQFNCSPPHYWLPNFMVDVFTWSLPFVGEKVTEMLVNVNINICSDELGSE-----EDG-----               |    |    |    |    |    |    |    | 58       | Hc naA                                      | -----FDGATA-AARKEVIRNKIRAIGKMARVFSVLRREESE                                 |     |     |     |     |     |  |  | 93  |
| Mc cnaA  | NNVMNIRQFNCTPHPYWLPNFMVDVFSWSLPFVGEKITDMLIAVILNVCSKEELAED-----DKQL----IEDK----SN-   |    |    |    |    |    |    |    | 65       | Mc cnaA                                     | -----NLDDA-EQRRIVIRNKIMAVGKISRVSVLRENSE                                    |     |     |     |     |     |  |  | 99  |
| Mc cnaB  | DNVMNIRQFNSTPHPYWLPNFMNVVDWSLPFVGEKVNTMLLAILSICTKEELLAE-----DDQA----HHEK----END     |    |    |    |    |    |    |    | 66       | Mc cnaB                                     | Q-----QELDEI-EQRKIVIRNKILAI GKISRVSVLRENSE                                 |     |     |     |     |     |  |  | 102 |
| Mc cnaC  | KSVLNI RQFNSSPPHYWLPNFMNVFNWSLPFVGEKITSMLLALLNICSQEELAAT-----PEQK----AMESPVVVVPE    |    |    |    |    |    |    |    | 70       | Mc cnaC                                     | N-----ADMT P--EQRRQI I RNKIMAI GKMSR TFSVLRRENSE                           |     |     |     |     |     |  |  | 105 |
| Mg CnaA  | NNVMNIRQFNCTPHPYWLPNFMVDVFTWSLPFVGEKITDMLLAILGTCSHEELR-E-----GDSS----STSPG---PQS    |    |    |    |    |    |    |    | 66       | Mg CnaA                                     | P-----PQTPALPEAAGDGE SSTSANAAMDPEST-EFKRRAIKNKILAI GRLSRVFQVLRREESE        |     |     |     |     |     |  |  | 126 |
| Mg yCnaA | NNVMNIRQFNCSPPHYWLPNFMVDVFTWSLPFVGEKITDMLIAILNNTCSKEELE-E-----ETPL----SASET---PPS   |    |    |    |    |    |    |    | 66       | Mg yCnaA                                    | P-----TLPS-----NDPEST-EFKRRAIKNKILAI GRLSRVFQVLRREESE                      |     |     |     |     |     |  |  | 106 |
| Mv CnaA  | NNVMNIRQFNATPHPYWLPNFMVDVFTWSLPFVGEKITDMLLAILNNTCSKEELA-E-----DDMI----LNLTD---GTS   |    |    |    |    |    |    |    | 66       | Mv CnaA                                     | AVSAMEVD TAPISSGSSHTSVS-TVSSI QDEDMT DAMTER-EANKNIRIQKILAI GRISRVFAVLRNESE |     |     |     |     |     |  |  | 134 |
| Nc CnaA  | NNVMNIRQFNCTPHPYWLPNFMVDVFTWSLPFVGEKITDMLIAILSTCSEELR-----EDSA----TTSPG---SAS       |    |    |    |    |    |    |    | 65       | Nc CnaA                                     | P-----ALP-----SAANQDPDSI-EFKRRAIKNKILAI GRLSRVFQVLRREESE                   |     |     |     |     |     |  |  | 108 |
| Pb cnaA  | NNVMNIRQFNCTPHPYWLPNFMVDVFTWSLPFVGEKITDMLIAILNNTCSKEELE-E-----ESP----SVSG---AAS     |    |    |    |    |    |    |    | 64       | Pb cnaA                                     | P-----ALQ-----MDPEST-EFKRRAIKNKILAI GRLSRVFQVLRREESE                       |     |     |     |     |     |  |  | 103 |
| Pt CnaA  | NNVMNIRQFNCTPHPYWLPNFMVDVFTWSLPFVGEKITDMLIAILGICTKEELD-E-----EEEE----LPLAS---EEV    |    |    |    |    |    |    |    | 66       | Pt CnaA                                     | E-----SDPD-----SPSAAAS-AERRQAIKNKIMAVGKMSRVFAVLRREEAE                      |     |     |     |     |     |  |  | 107 |
| Ro CnaA  | NNVMNIRQFNCTPHPYWLPNFMVDVFTWSLPFVGEKITDMLISVLNVCSKEELAED-----D-QL----LEEK----P--    |    |    |    |    |    |    |    | 63       | Ro CnaA                                     | -----VTDDA-EQRRIVIRNKIMAVGKMSRVFSVLRRENSE                                  |     |     |     |     |     |  |  | 97  |
| Sc CnaA  | ENVMNIRQFHMSPPHYWLPDFMVDVFTWSLPFVGEKVTSMVLSIILNICSQEQLDPESEPKAAEETVKARANATKETGT PSD |    |    |    |    |    |    |    | 80       | Sc CnaA                                     | E-----KASSAILEDET RRKALRNKILAIKAVSRMFSVLRREESE                             |     |     |     |     |     |  |  | 119 |
| Sp CnaA  | NNVMNIRQFNCSPPHYWLPNFMVDVFTWSLPFVGEKVSEMLISMLNICSKEELYET-----DLKE----SAPTQHKQPAP    |    |    |    |    |    |    |    | 70       | Sp CnaA                                     | S-----ENENKADQEIDI-EARRQI IKNKIMAI GRISRVFSVLRREERE                        |     |     |     |     |     |  |  | 112 |
| Tr CnaA  | NNVMNIRQFNCSPPHYWLPNFMVDVFTWSLPFVGEKITDMLIAILNNTCSKEELE-E-----ETPL----SASEA---PPS   |    |    |    |    |    |    |    | 66       | Tr CnaA                                     | P-----TLPS-----TDPEST-EFKRRAIKNKILAI GRLSRVFQVLRREESE                      |     |     |     |     |     |  |  | 106 |
| Um CnaA  | NNVMNIRQFNCTPHPYWLPNFMVDVFTWSLPFVGEKITDMLIAILNVCSKEELE-E-----EEEE----DEI PT---TPT   |    |    |    |    |    |    |    | 66       | Um CnaA                                     | -----SAAEET-AERTLIKNKILAVGRMSRVFALLREEAE                                   |     |     |     |     |     |  |  | 102 |
