# Supplementary material for: Phosphorylation of Calcineurin at a Novel Serine-Proline Rich Region Orchestrates Hyphal Growth and Virulence in Aspergillus fumigatus
Source: PubMed Central journal article supplement (PMC3749960; doi:10.1371/journal.ppat.1003564), 2013-08-22

19-RASVGTSQLLDNIVSASNFRDEVDR-44

$\text{PO}_4$   $\text{PO}_4$

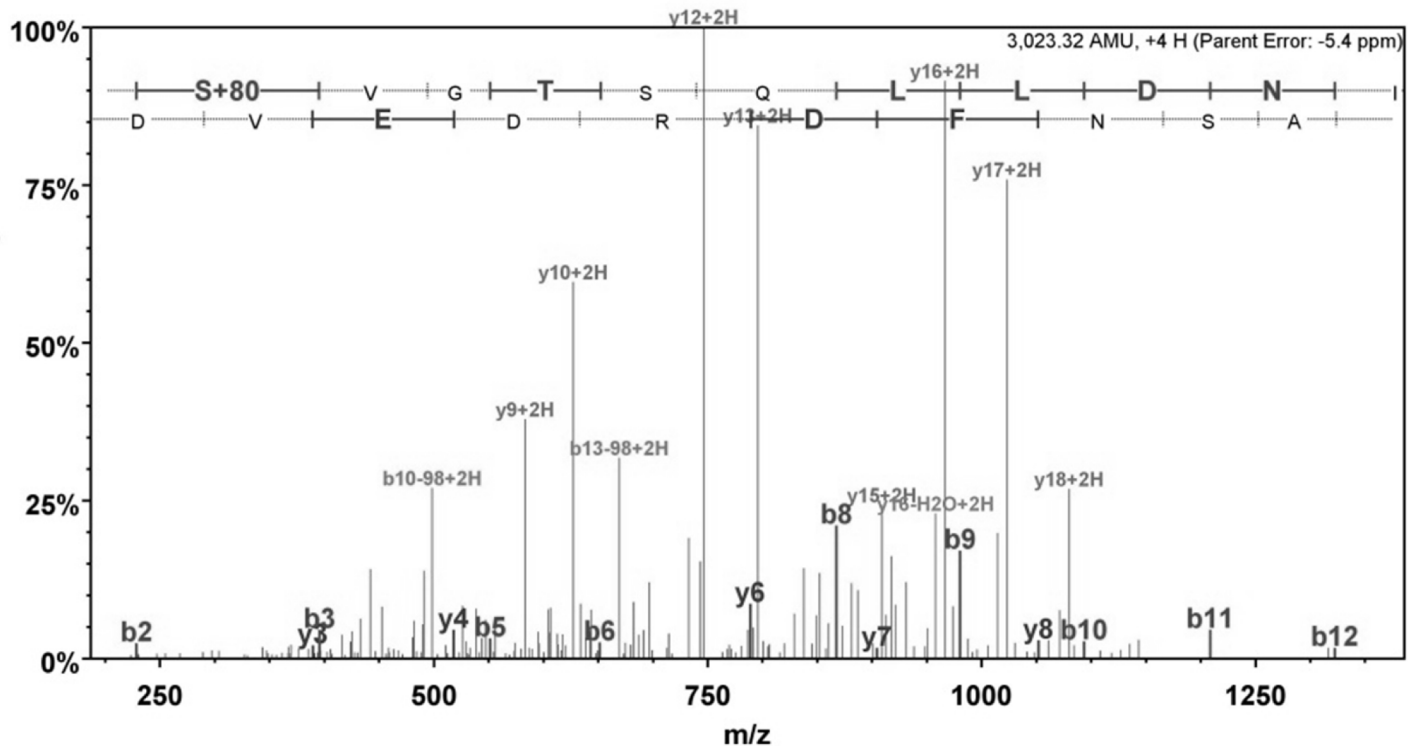

Supplement: ppat.1003564.s002.pdf [file ppat.1003564.s002.pdf]
