# Supplementary material for: Phosphorylation of Calcineurin at a Novel Serine-Proline Rich Region Orchestrates Hyphal Growth and Virulence in Aspergillus fumigatus
Source: PubMed Central journal article supplement (PMC3749960; doi:10.1371/journal.ppat.1003564), 2013-08-22

**A 420-EGDSSSTSPGPQS\*PPQT\*PALPEAAGDGECSSTSANAAAMDPEISIEFK-466**

Mascot Ion Score: 56.0

Ascore Localization: &lt;50%

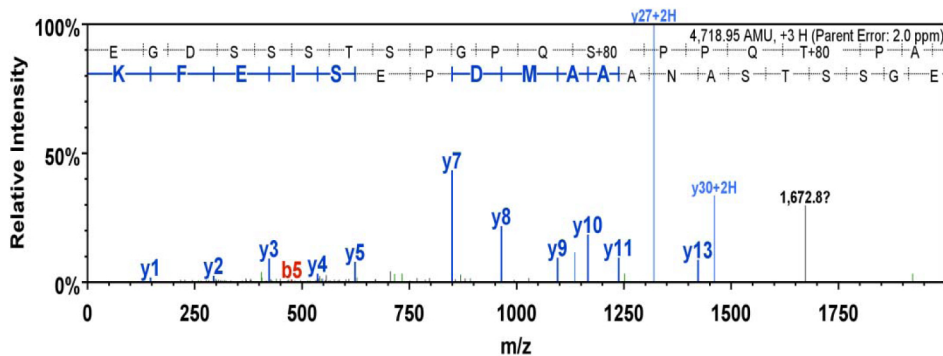**Extracted Ion Chromatogram**

1574.28 m/z (20 ppm)

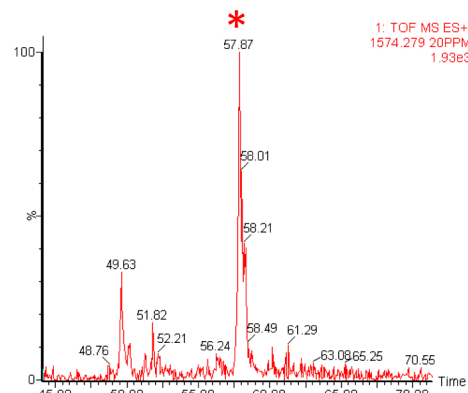**B 575-RLS\*TSSSSDR-584**

Mascot Ion Score: 44.2

Ascore Localization: &lt;80%

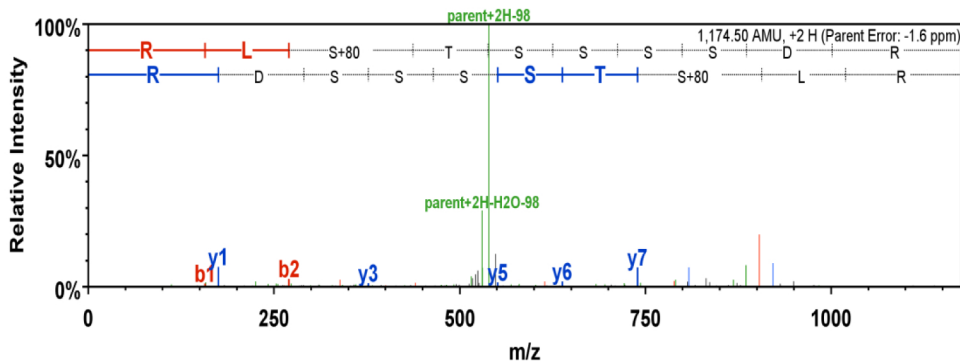**Extracted Ion Chromatogram**

588.26 m/z (20 ppm)

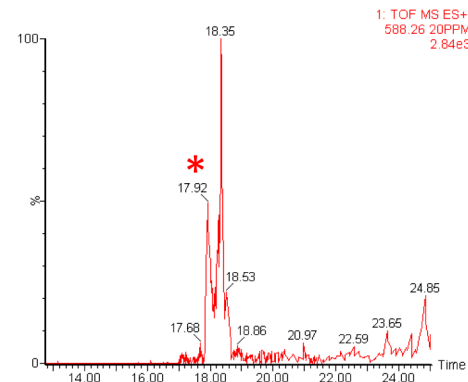

Supplement: ppat.1003564.s003.pdf [file ppat.1003564.s003.pdf]
