# Supplementary material for: Phosphorylation of Calcineurin at a Novel Serine-Proline Rich Region Orchestrates Hyphal Growth and Virulence in Aspergillus fumigatus
Source: PubMed Central journal article supplement (PMC3749960; doi:10.1371/journal.ppat.1003564), 2013-08-22

**417-**  
**EDSATTSPGSASPALPSAANQDPDSIEFK**  
**-445**

Mascot Ion Score: 36.1

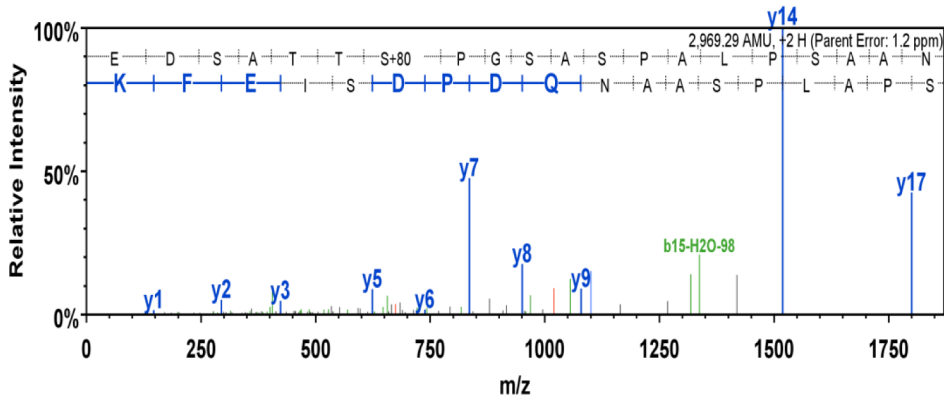

**Extracted Ion Chromatogram**  
**1485.65 m/z (20 ppm)**

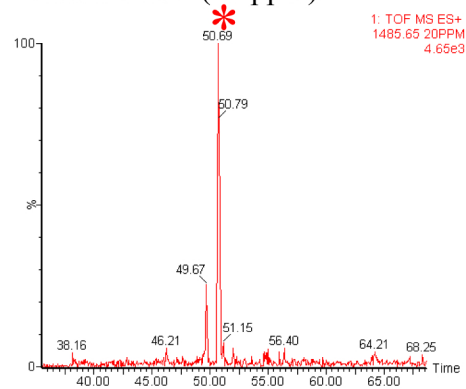

Supplement: ppat.1003564.s004.pdf [file ppat.1003564.s004.pdf]
