# Supplementary material for: Phosphorylation of Calcineurin at a Novel Serine-Proline Rich Region Orchestrates Hyphal Growth and Virulence in Aspergillus fumigatus
Source: PubMed Central journal article supplement (PMC3749960; doi:10.1371/journal.ppat.1003564), 2013-08-22

A

**401-AMES\*PVVVVPENADMTPEQR-420**

Mascot Ion Score: 50.8

Ascore Localization: &gt;99%

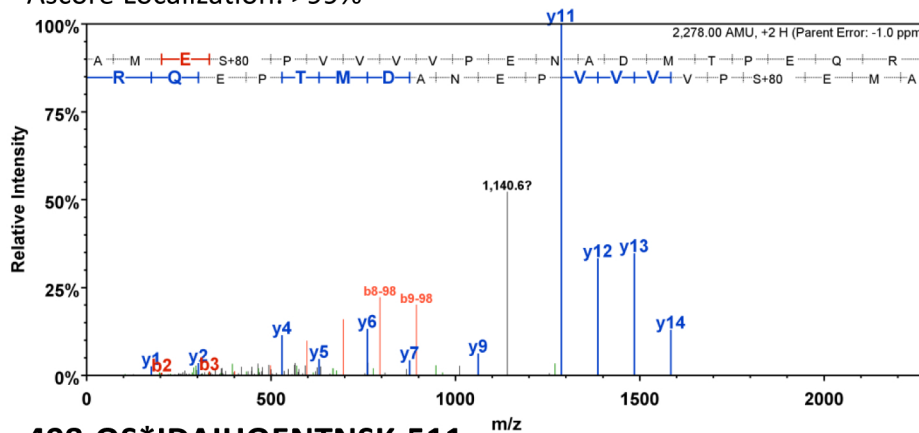**Extracted Ion Chromatogram**

1140.01 m/z (20 ppm)

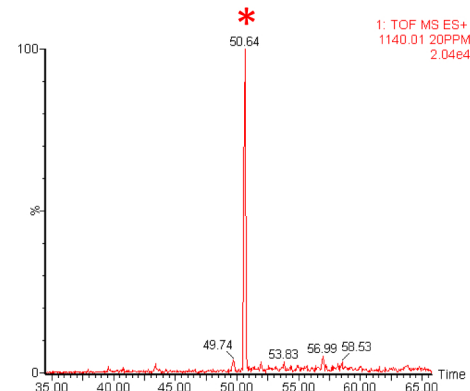

B

**498-QS\*IDAIHQENTNSK-511**

Mascot Ion Score: 77.2

Ascore Localization: &gt;99%

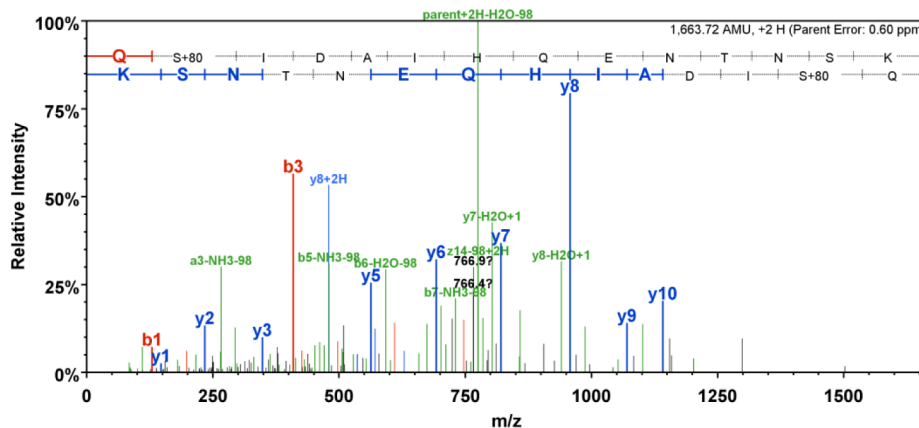**Extracted Ion Chromatogram**

832.87 m/z (20 ppm)

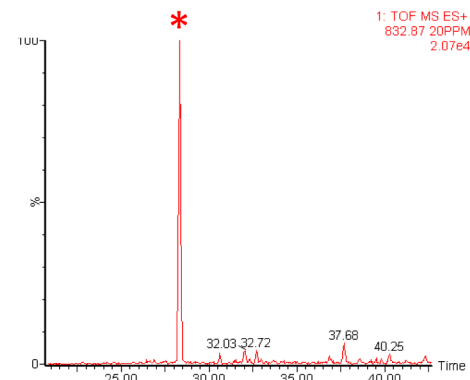

Supplement: ppat.1003564.s005.pdf [file ppat.1003564.s005.pdf]
