# Supplementary material for: Phosphorylation of Calcineurin at a Novel Serine-Proline Rich Region Orchestrates Hyphal Growth and Virulence in Aspergillus fumigatus
Source: PubMed Central journal article supplement (PMC3749960; doi:10.1371/journal.ppat.1003564), 2013-08-22

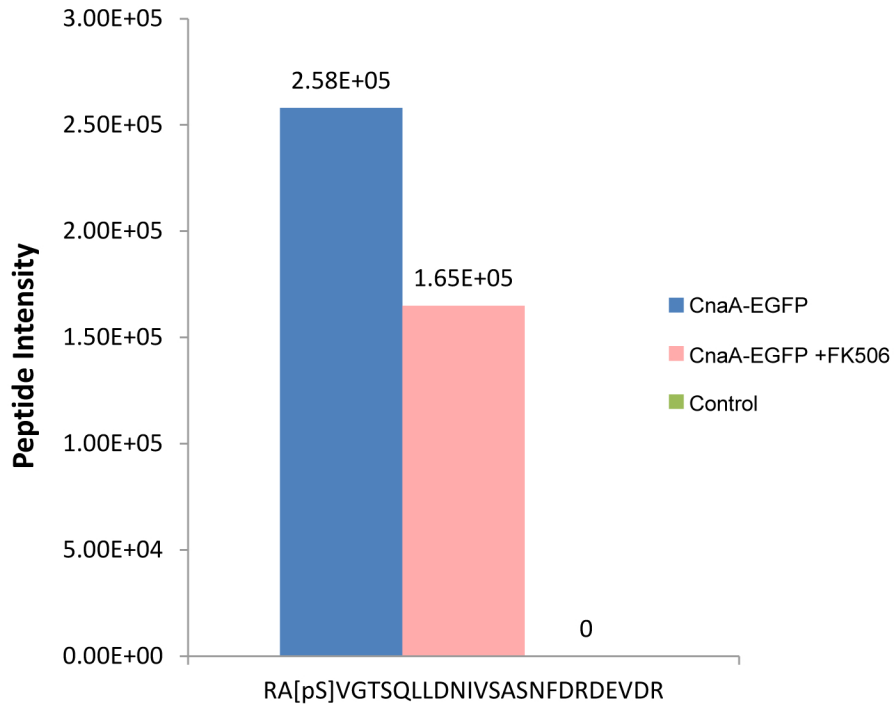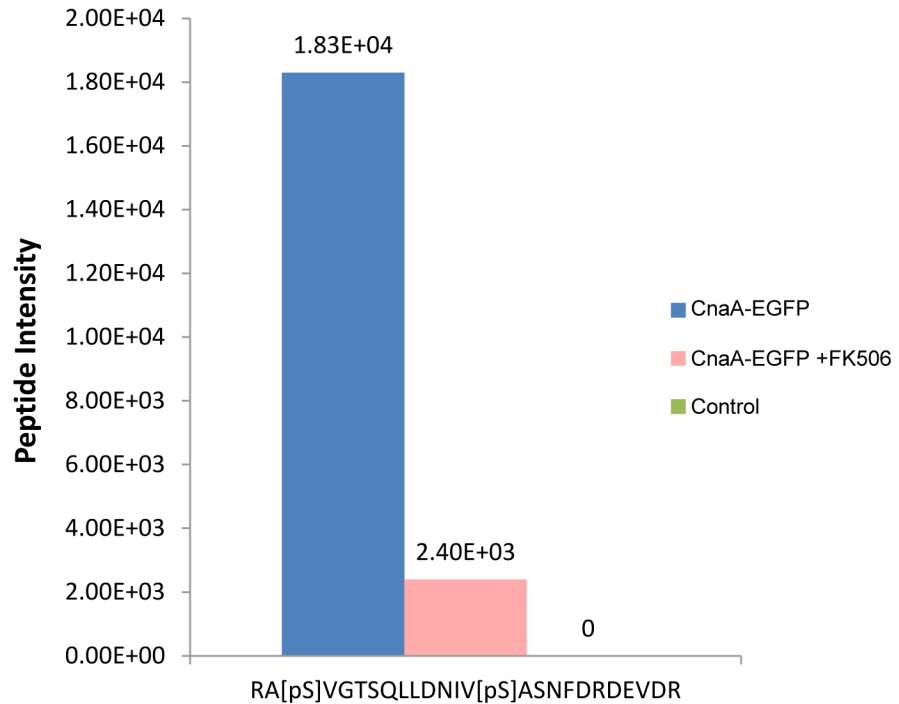

Supplement: ppat.1003564.s007.pdf [file ppat.1003564.s007.pdf]
