# Supplementary material for: Phosphorylation of Calcineurin at a Novel Serine-Proline Rich Region Orchestrates Hyphal Growth and Virulence in Aspergillus fumigatus
Source: PubMed Central journal article supplement (PMC3749960; doi:10.1371/journal.ppat.1003564), 2013-08-22

Caspofungin ( $\mu\text{g/ml}$ )

0

1

2

4

WT

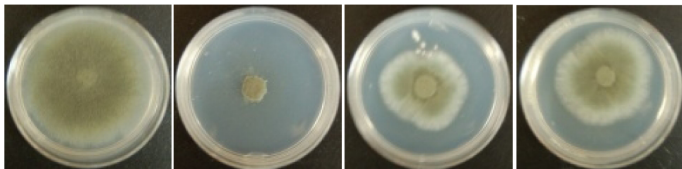

NIR-AAA

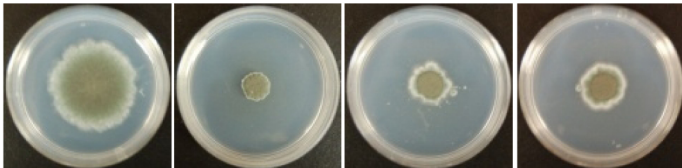

RVF-AAA

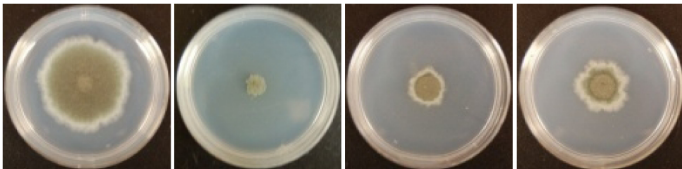

V371D

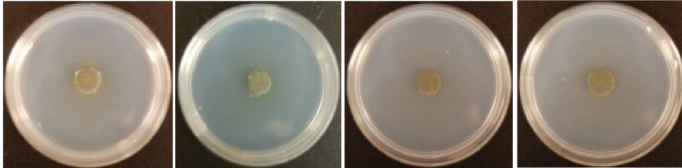

THL-PLS

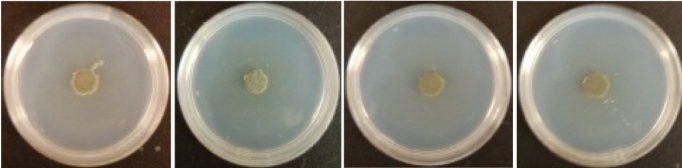

Supplement: ppat.1003564.s008.pdf [file ppat.1003564.s008.pdf]
